## P575

## Usefulness of late gadolinium enhancement cardiac magnetic resonance to predict appropriate therapies in implantable cardioverter defibrillator patients in primary prevention

Sanchez Somonte P.<sup>1</sup>; Zaraket F.<sup>1</sup>; Quinto L.<sup>1</sup>; Garre P.<sup>1</sup>; Alarcon F.<sup>1</sup>; Tolosana JM.<sup>1</sup>; Guasch E.<sup>1</sup>; Arbelo E.<sup>1</sup>; Doltra A.<sup>1</sup>; Ortiz JM.<sup>1</sup>; Borrás R.<sup>1</sup>; Prat S.<sup>1</sup>; Martín Sanchez G.<sup>2</sup>; Mont L.<sup>1</sup>; Roca Luque I.<sup>1</sup>

<sup>1</sup>HOSPITAL CLINIC OF BARCELONA, Barcelona, Spain

<sup>2</sup>University Hospital of Tarragona Joan XXIII, Tarragona, Spain

**Funding Acknowledgements:** No funding acknowledgements

**OnBehalf:** VT and sudden cardiac death

**Background:** The scar and the amount of border zone measured by late gadolinium enhancement cardiac magnetic resonance (LGE-CMR) has been proposed as an independent predictor of ventricular arrhythmias in patients with ischemic and non-ischemic cardiomyopathy. However, at the present time, the guidelines are based only on the ejection fraction to recommend an implantable cardioverter defibrillator (ICD) in primary prevention, and only a minority of these patients receive appropriate therapies. So, prevention needs to be improved.

**Purpose:** To identify predictors of appropriate therapies in patients with a primary prevention ICD using cardiac magnetic resonance imaging and a dedicated software (ADAS-3D) to characterize the scar.

**Methods:** All consecutive patients who underwent a LGE-MR prior to ICD implantation in primary prevention were prospectively included. Clinical and cardiac imaging characteristics were collected. The myocardium was segmented with ADAS-3D software in 10 layers (from endocardium to epicardium). The scar, border zone, core and conducting channels were automatically measured in grams by the software.

**Results:** Since 2008 to 2017, 206 patients were included. Mean age was 67 +/- 28 years, 80% men, mean ejection fraction 26% +/- 9, 52% with ischemic cardiomyopathy and 48% non-ischemic. The primary endpoint was appropriate therapies and/or sudden cardiac death (SCD). Median follow-up was 46,33 months. 46 patients (22%) reached the primary endpoint. Greater scar mass (36,05 grams vs 21,5 grams; HR 1.04; 95% CI (1.03-1.05), p <0.001), core mass (9,8 grams vs 5,6 grams; HR 1.06; 95% CI (1.04-1.09), p <0.001), border zone mass (26,2 grams vs 15,9 grams; HR 1.05; 95% CI (1.04-1.09), p <0.001) and channel mass (3,0 grams vs 1,6 grams; HR 1.15 95% CI (1.06-1.25), p <0.001) were associated with appropriate therapies and SCD. A border zone mass >5.3 grams was independently associated with the primary endpoint (HR: 4.77; 95% CI (1.15-19.73), p = 0.03).

**Conclusions:** The amount of border zone, core and channel mass measured by LGE-MR and ADAS software are independent predictors of appropriate therapies and SCD in patients with ICD in primary prevention.

Abstract Figure. Scar characterization

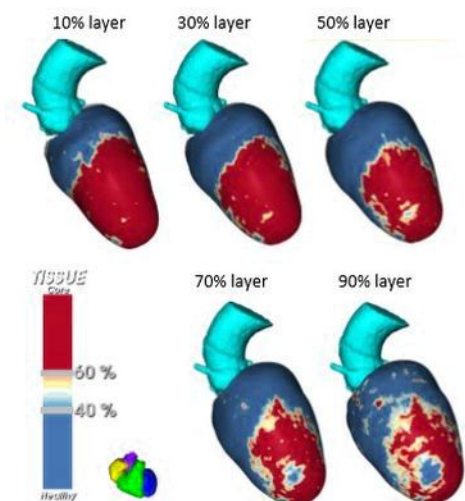

Source: http://academic.oup.com/europace/article-pdf/22/Supplement_1/euaa162.149/33401731/euaa162.149.pdf
